# Supplementary material for: Probing semiconductivity in crystals of stable semiquinone radicals: organic salts of 5,6-dichloro-2,3-dicyanosemiquinone (DDQ) radical anions
Source: Royal Society of Chemistry journal article supplement (doi:10.1039/c7ce02146a), 2018-01-01
Supplement: c7ce02146a1.pdf [file c7ce02146a1.pdf]

**Probing semiconductivity  
in crystals of stable semiquinone radicals: organic salts of 5,6-dichloro-2,3-  
dicyanosemiquinone (DDQ) radical anion**

Krešimir Molčanov<sup>\*a</sup>, Dietmar Stalke<sup>\*b</sup>, Ana Šantić<sup>a</sup>, Serhiy Demeshko<sup>b</sup>, Vladimir Stilinović<sup>c</sup>,  
Zhongyu Mou<sup>d</sup>, Miklos Kertesz<sup>d</sup>, Biserka Kojić-Prodić<sup>a</sup>

a Ruđer Bošković Institute, Bijenička 54, Zagreb HR-10000, Croatia

b Institut für Anorganische Chemie, Universität Göttingen, Tammanstraße 4, D-37077  
Göttingen, Germany

c Department of Chemistry, Faculty of Science, University of Zagreb, Horvatovac 102a,  
Zagreb HR-10000, Croatia

d Department of Chemistry and Institute of Soft Matter, Georgetown University, 424 Regents  
Hall, Washington DC 20057-1227, USA. Department of Chemistry and Institute of Soft  
Matter, Georgetown University, 424 Regents Hall, Washington DC 20057-1227, USA.

e-mail: kmolcano@irb.hr, dstalke@chemie.uni-goettingen.de

**Supplementary Information**

**S1 ORTEP drawings**

**S2 Geometry of the DDQ radical anion**

**S3 Data on crystal packing**

**S4 Details on electrical measurements**

**S5 Cartesian coordinates of the converged geometries and the corresponding absolute  
energies (in Hartrees).**

## S1 ORTEP drawings

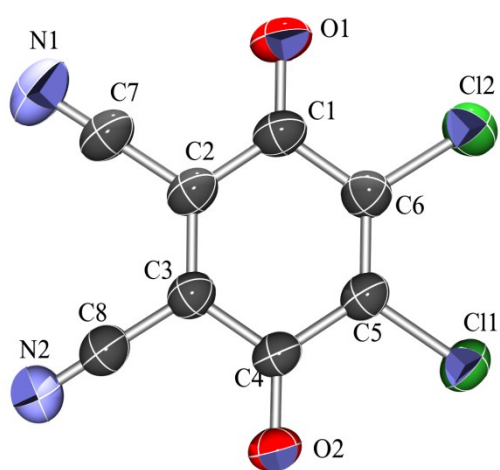

a)

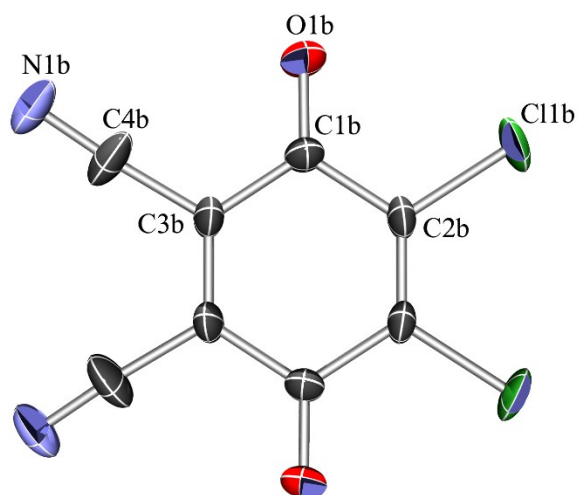

b)

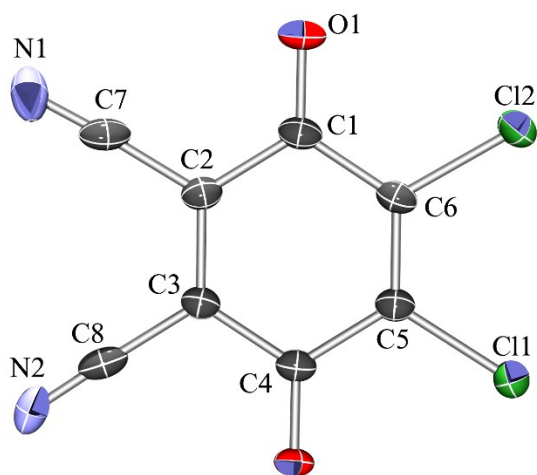

c)

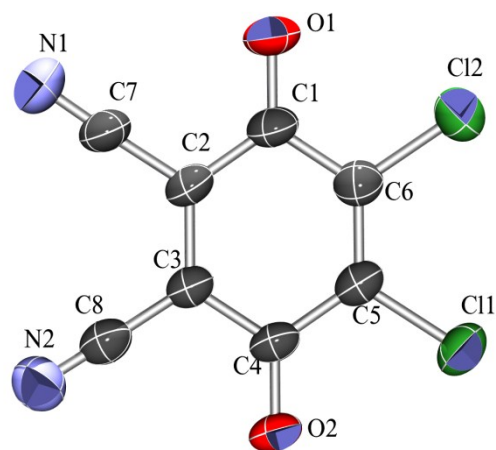

d)

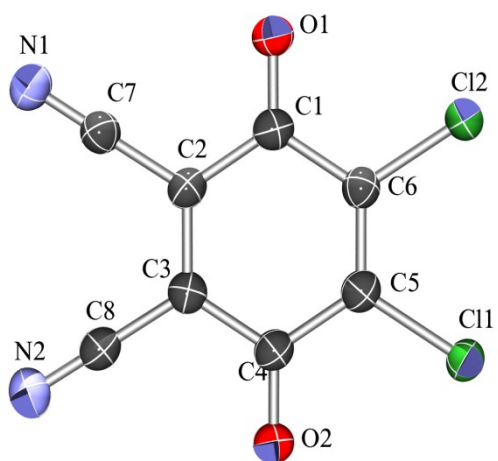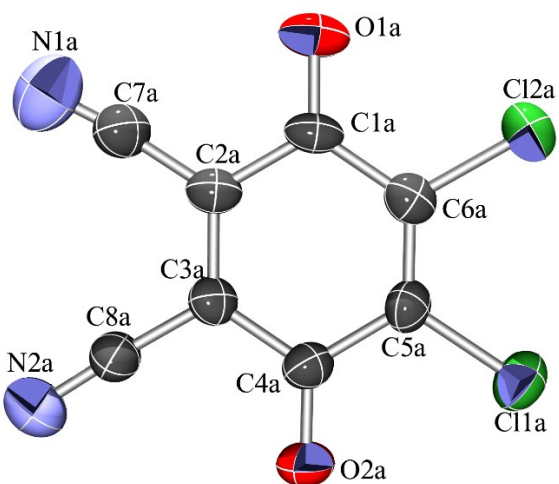

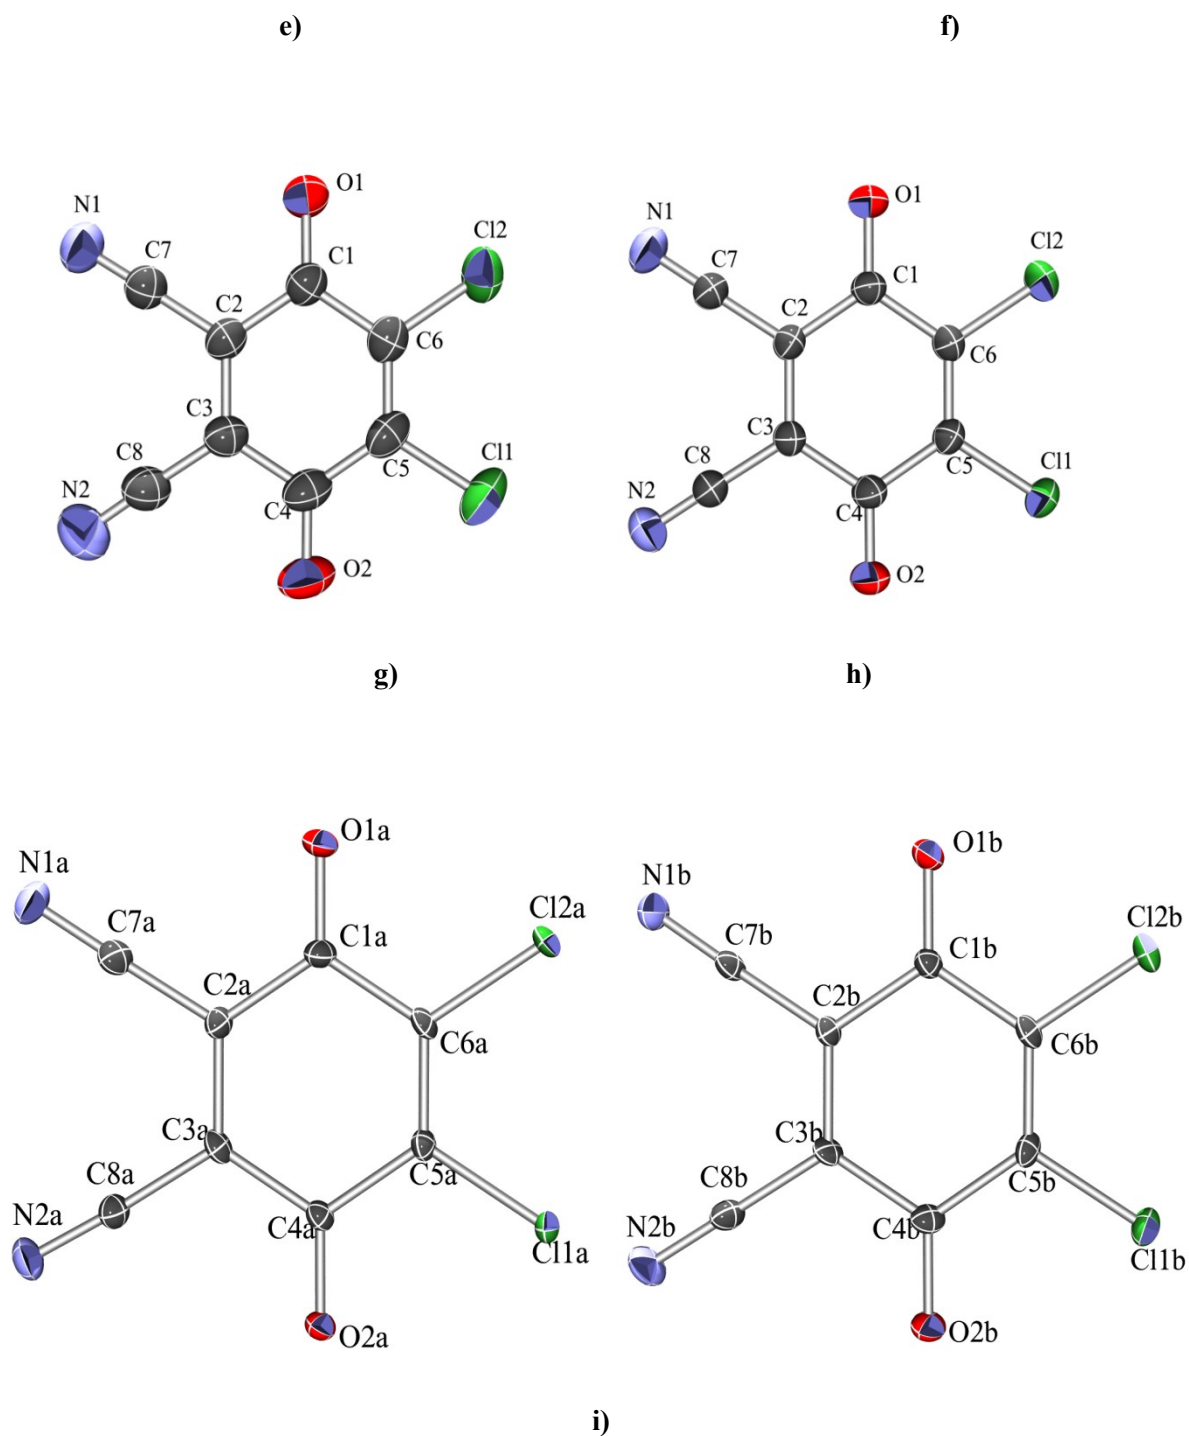

**Figure S1** ORTEP-3 drawing of DDQ radical anion with atom numbering scheme in a) **1**, b) **2**-equidistant, c) **2**-dimers, d) **3**, e) **4**, f) **5**, g) **6**, h) **8** and i) two symmetry independent anions in **7**. Displacement ellipsoids are drawn for the probability of 50%; only the major component of the disorder is shown for **2**-equidistant and **5**.

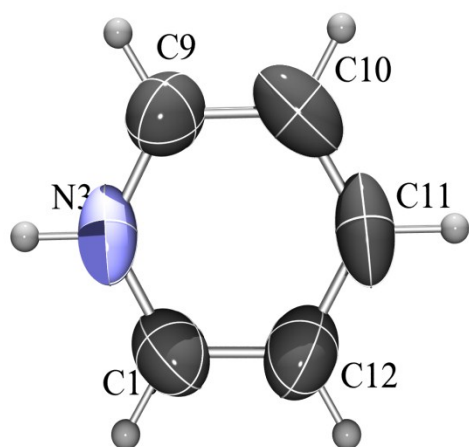

a)

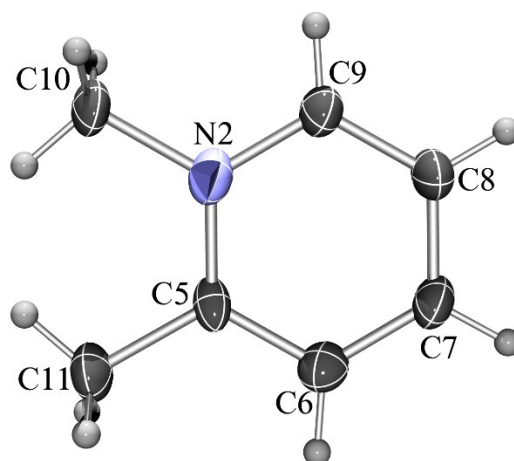

b)

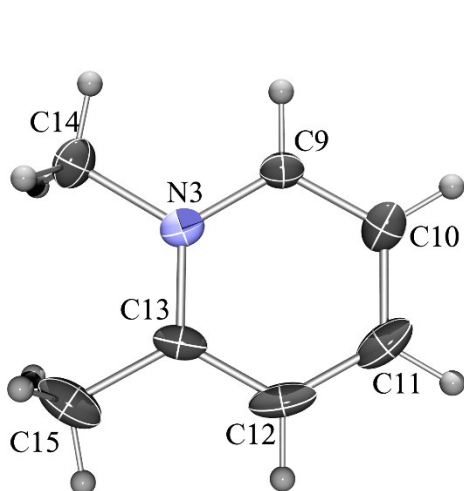

c)

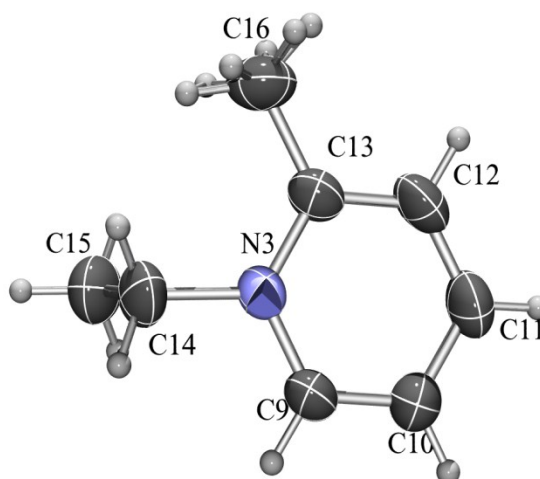

d)

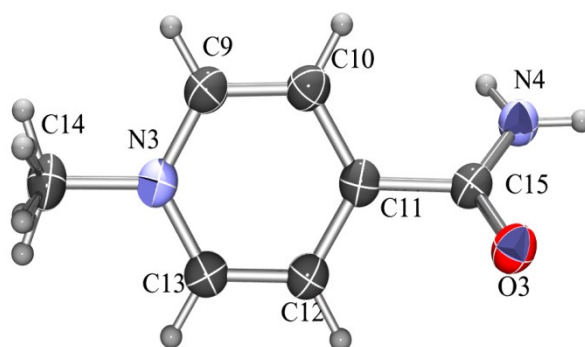

e)

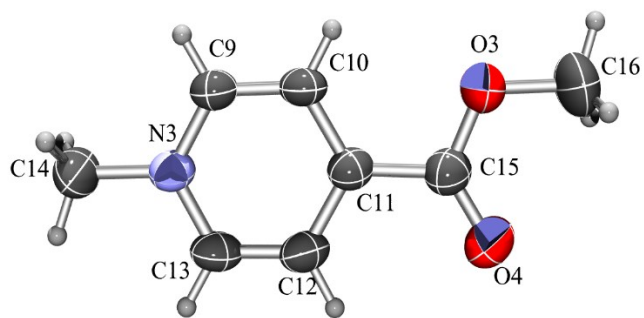

**f)**

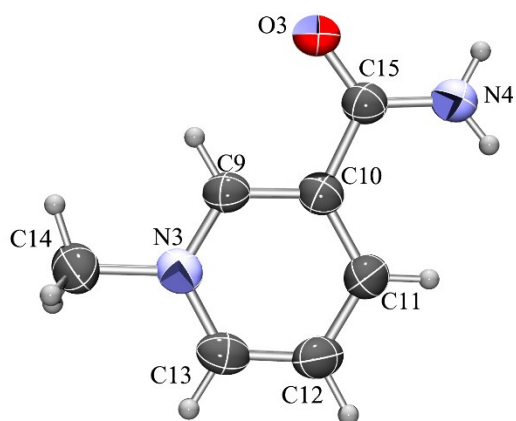

**g)**

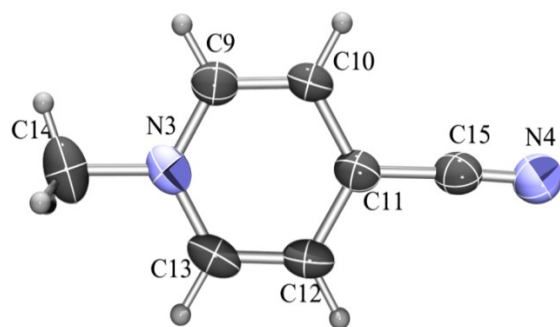

**h)**

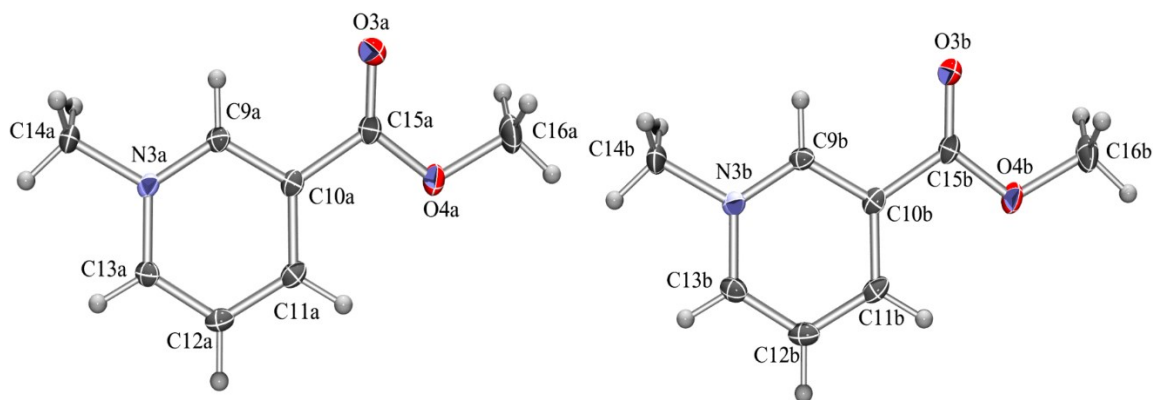

i)

**Figure S2** ORTEP-3 drawings of cations: a) pyridinium from **1**, b) *N*-methyl-2-methylpyridinium from **2**-equidistant, c) *N*-methyl-2-methylpyridinium from **2**-dimers, d) *N*-ethyl-2-methylpyridinium from **3**, e) *N*-methyl-4-amidopyridinium from **4**, f) *N*-methyl-4-carboxymethylpyridinium from **5**, g) *N*-methyl-3-amidopyridinium from **6**, h) *N*-methyl-4-cyanopyridinium from **8**, and i) two symmetry-independent *N*-methyl-3-carboxymethylpyridinium cations from **7**. Displacement ellipsoids are drawn for the probability of 50 % and hydrogen atoms are shown as spheres of arbitrary radii.

## S2 Geometry of the DDQ radical anion

**Table S1** Geometric parameters of DDQ radical anions (Å, °). Compounds **2**-equidistant and **5** have been omitted due to disorder and poor data, respectively.

|        | <b>1</b> | <b>2-</b><br>dimers | <b>3</b> | <b>4</b> | <b>6</b> | <b>7 A</b> | <b>7 B</b> | <b>8</b>   |
|--------|----------|---------------------|----------|----------|----------|------------|------------|------------|
| C1-O1  | 1.238(3) | 1.243(3)            | 1.242(2) | 1.239(3) | 1.245(3) | 1.242(3)   | 1.245(3)   | 1.2418(15) |
| C4-O2  | 1.253(3) | 1.241(3)            | 1.245(2) | 1.248(3) | 1.245(3) | 1.245(3)   | 1.239(3)   | 1.2379(16) |
| C1-C2  | 1.454(4) | 1.458(3)            | 1.444(3) | 1.452(4) | 1.449(3) | 1.444(3)   | 1.453(3)   | 1.4522(17) |
| C2-C3  | 1.374(3) | 1.388(3)            | 1.383(2) | 1.391(3) | 1.387(3) | 1.390(3)   | 1.383(3)   | 1.3870(17) |
| C3-C4  | 1.439(3) | 1.446(3)            | 1.445(2) | 1.447(3) | 1.452(3) | 1.443(3)   | 1.450(3)   | 1.4552(17) |
| C4-C5  | 1.467(4) | 1.470(3)            | 1.469(3) | 1.462(4) | 1.462(4) | 1.472(3)   | 1.470(3)   | 1.4650(17) |
| C5-C6  | 1.357(3) | 1.363(3)            | 1.361(3) | 1.373(4) | 1.359(3) | 1.360(3)   | 1.362(3)   | 1.3548(17) |
| C6-C1  | 1.470(4) | 1.461(3)            | 1.461(3) | 1.467(3) | 1.465(3) | 1.469(3)   | 1.463(3)   | 1.4693(17) |
| C2-C7  | 1.432(4) | 1.434(3)            | 1.431(3) | 1.433(3) | 1.433(3) | 1.431(4)   | 1.436(4)   | 1.4322(17) |
| C3-C8  | 1.439(4) | 1.445(3)            | 1.429(3) | 1.440(4) | 1.427(4) | 1.438(3)   | 1.438(3)   | 1.4324(17) |
| C7-N1  | 1.135(5) | 1.083(3)            | 1.128(3) | 1.150(3) | 1.135(3) | 1.155(4)   | 1.154(3)   | 1.1407(17) |
| C8-N2  | 1.134(4) | 1.062(3)            | 1.109(3) | 1.143(4) | 1.141(4) | 1.149(3)   | 1.150(3)   | 1.1469(18) |
| C5-Cl1 | 1.719(2) | 1.737(2)            | 1.723(2) | 1.726(2) | 1.717(2) | 1.720(2)   | 1.722(2)   | 1.7145(12) |
| C6-Cl2 | 1.715(3) | 1.738(2)            | 1.724(2) | 1.711(3) | 1.723(2) | 1.716(2)   | 1.719(2)   | 1.7147(13) |
| $\tau$ | 3.9      | 2.8                 | 4.2      | 2.5      | 3.0      | 3.8        | 2.8        | 3.9        |

### S3 Data on crystal packings

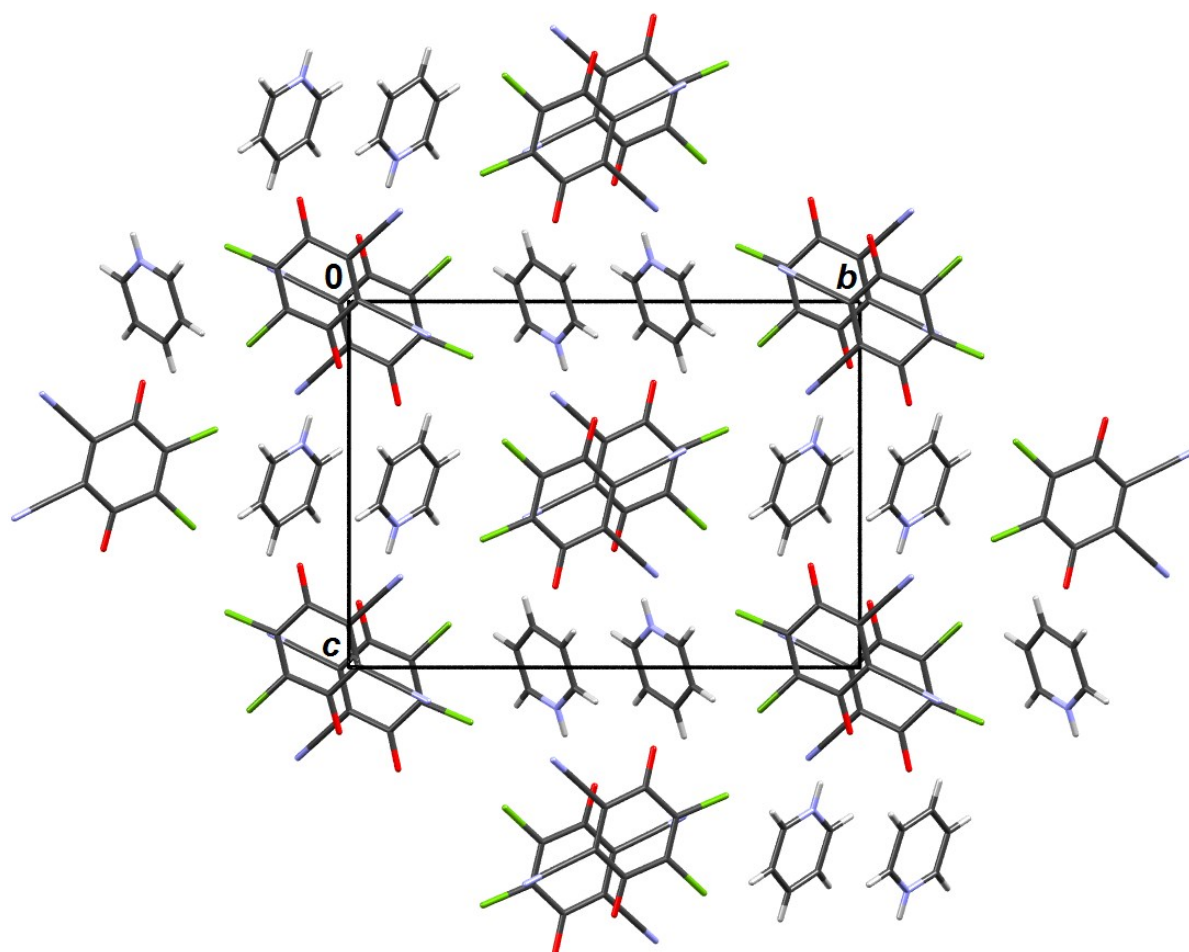

**Figure S3** Crystal packing of **1** viewed in the direction  $[100]$ .



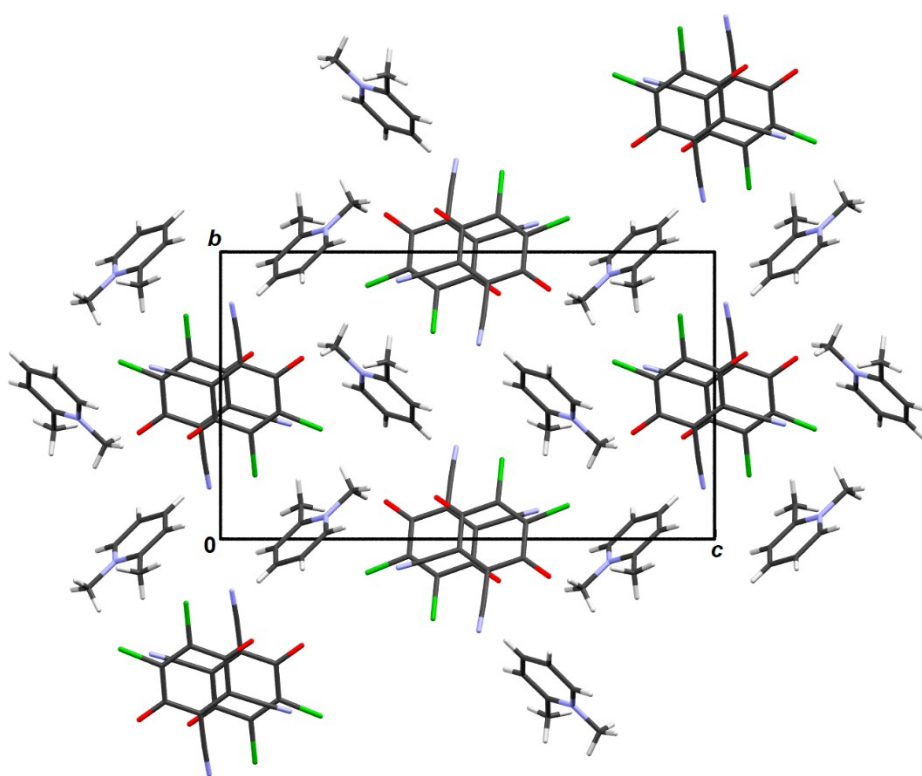

**Figure S4** Crystal packing of **2-dimers** viewed in the direction [100].

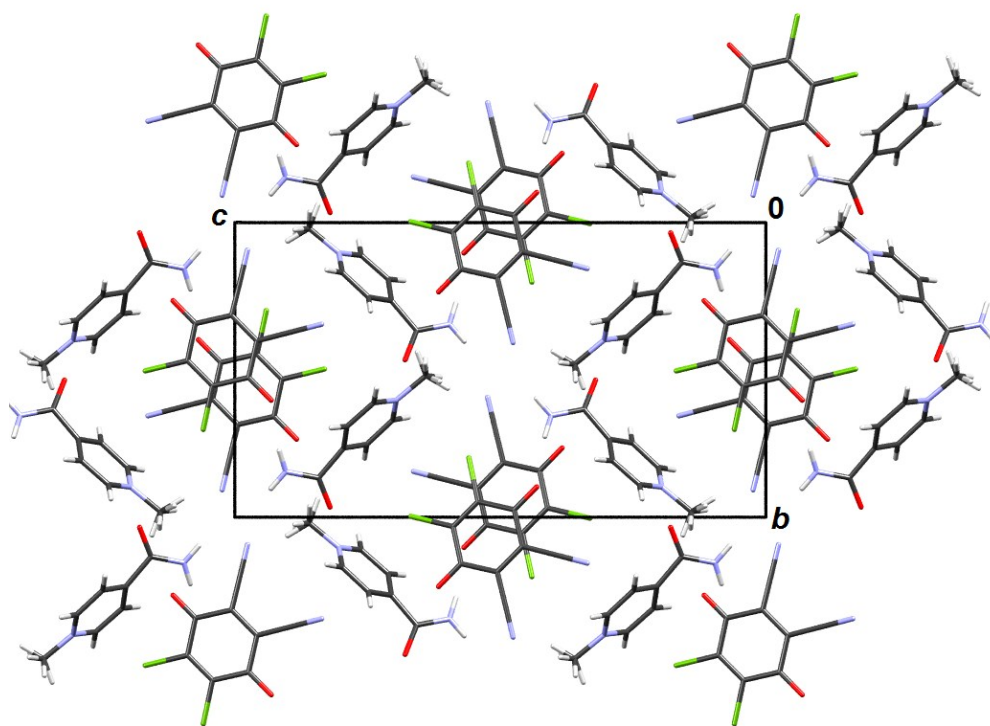

**Figure S5** Crystal packing of **4** viewed in the direction [100].

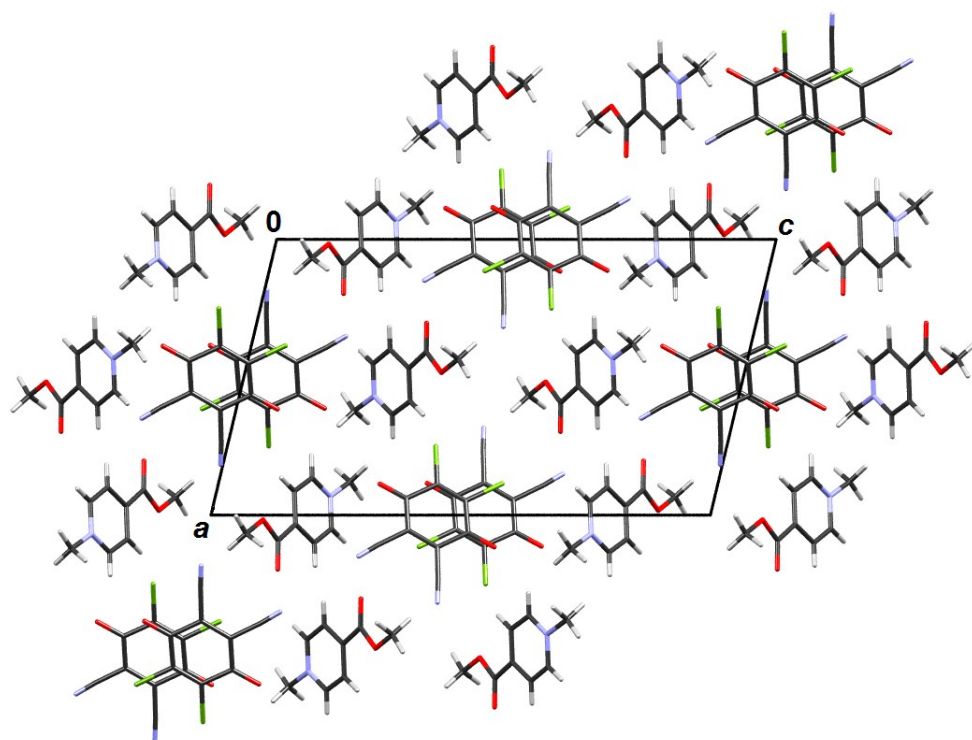

**Figure S6** Crystal packing of **5** viewed in the direction  $[010]$ .

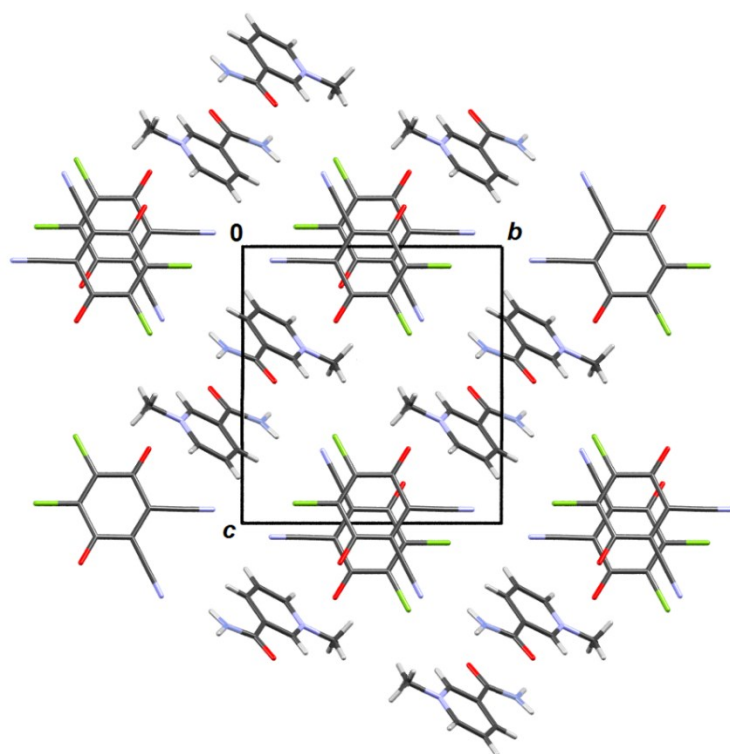

**Figure S7** Crystal packing of **6** viewed in the direction  $[100]$ .

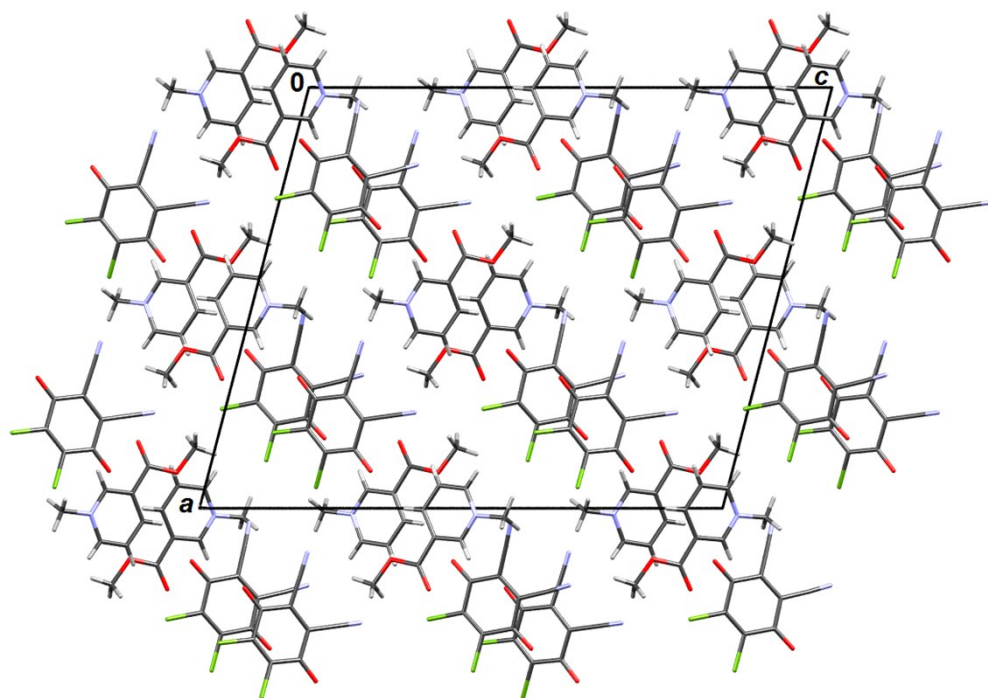

**Figure S8** Crystal packing of **7** viewed in the direction  $[010]$ .

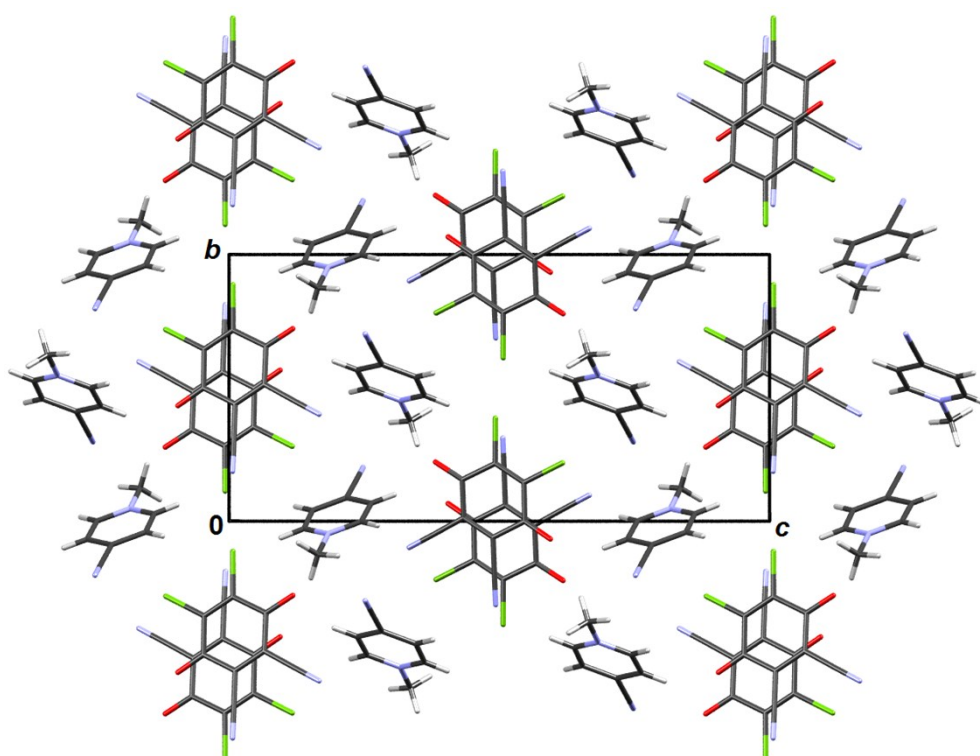

**Figure S9** Crystal packing of **8** viewed in the direction  $[100]$ .

#### S4 Details on electrical measurements

Axes of all crystals were checked on a diffractometer: unit cell and orientation matrix were found, and then direction of the crystallographic axes were found using the tool for indexing faces (simply by defining faces  $\{100\}$ ,  $\{010\}$  and  $\{001\}$ ). In all compounds the direction of stacking corresponded to the longest axis of the crystal (Figs. S10-S17). The electrical contacts were made by application of silver paste to opposite ends of rod-like crystals (Fig. S18). For electrical measurements we used the largest crystals in our samples, which were typically about 0.5 mm long and 0.1 mm thick.

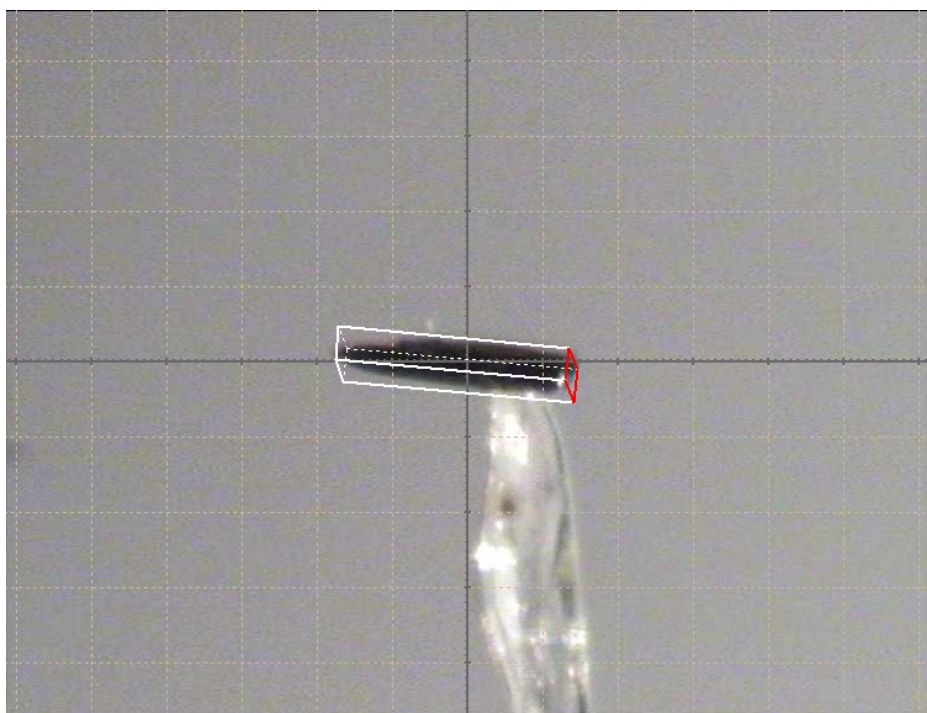

**Figure S10** Crystal of 2-equidistant with crystallographic axes indicated by defining fictive faces  $\{100\}$ ,  $\{010\}$  and  $\{001\}$ . Direction of stacking is the longest axis,  $[100]$ , so the  $(100)$  face is highlighted in red.



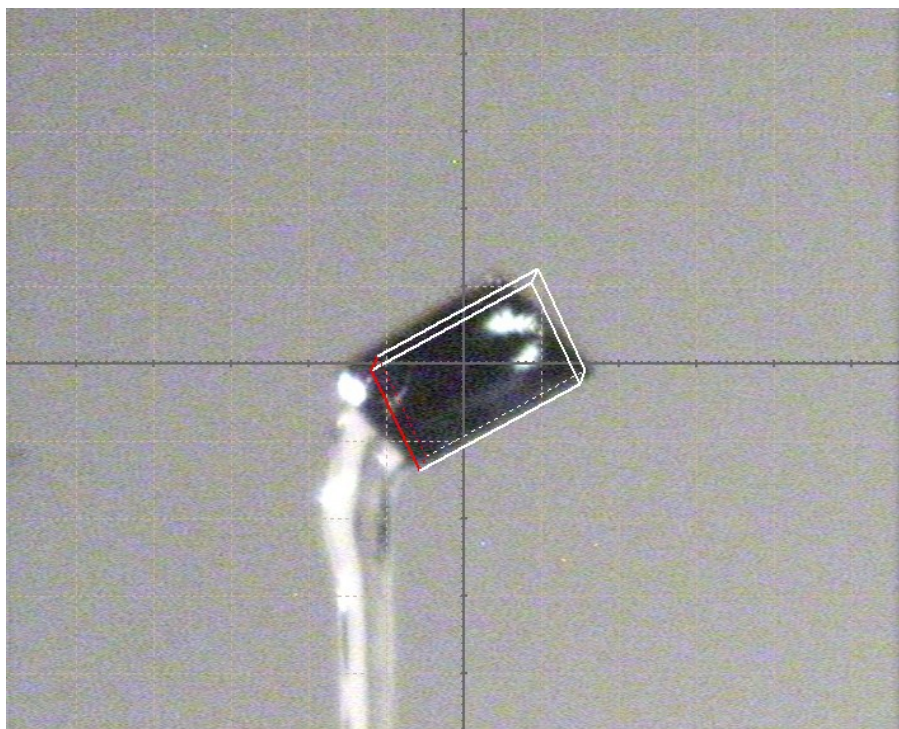

**Figure S11** Crystal of **2**-dimers with crystallographic axes indicated by defining fictive faces  $\{100\}$ ,  $\{010\}$  and  $\{001\}$ . Direction of stacking is the longest axis,  $[100]$ , so the  $(100)$  face is highlighted in red.

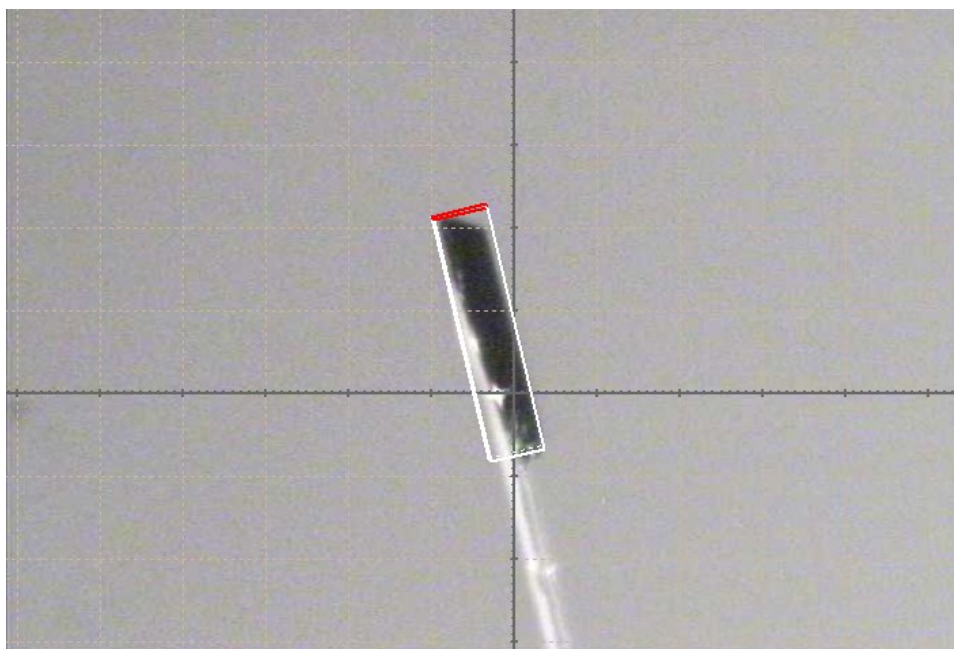

**Figure S12** Crystal of **3** with crystallographic axes indicated by defining fictive faces  $\{100\}$ ,  $\{010\}$  and  $\{001\}$ . Direction of stacking is the longest axis,  $[001]$ , so the  $(001)$  face is highlighted in red.

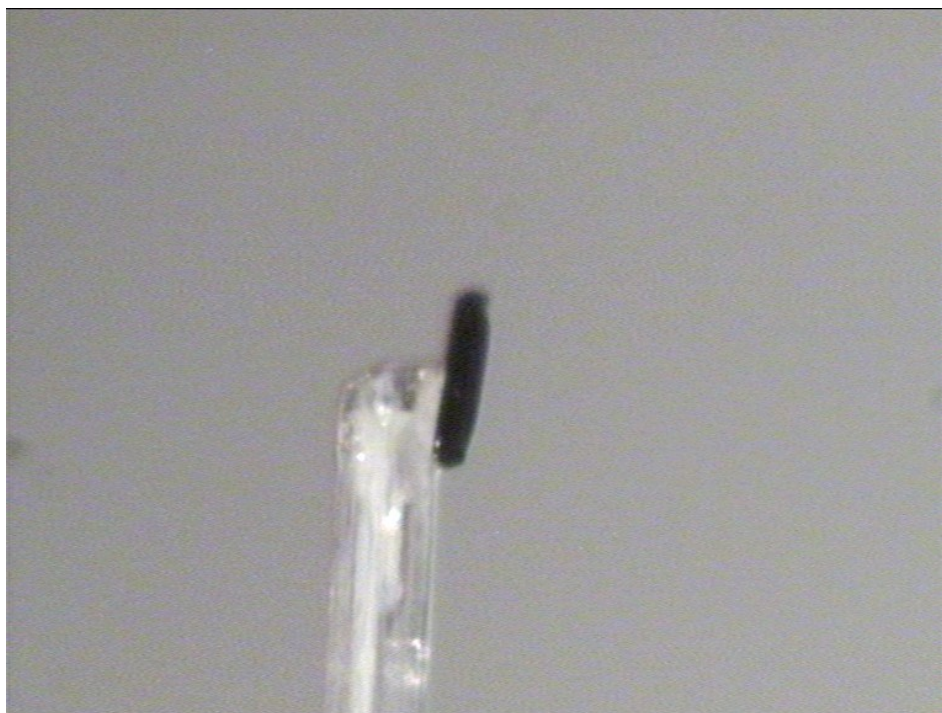

**Figure S13** Crystal of **4**. The raw data were unfortunately lost due to a malfunction of a hard drive; however it is reasonable to assume that the longest axis of the crystal corresponds to the direction  $[100]$ , which is the direction of stacking.

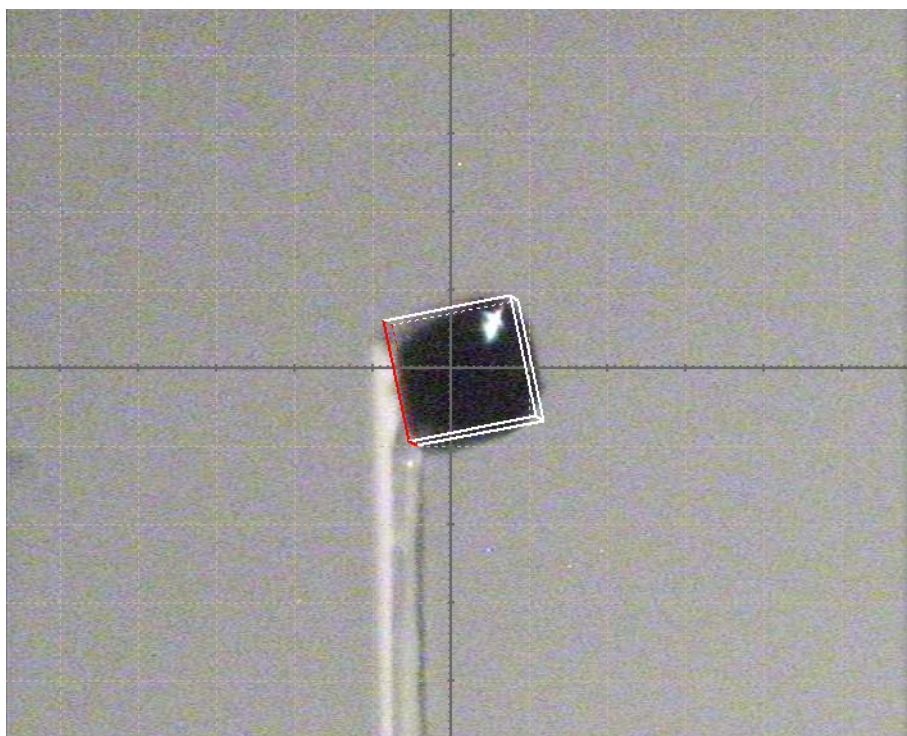

**Figure S14** Crystal of **5** with crystallographic axes indicated by defining fictive faces  $\{100\}$ ,  $\{010\}$  and  $\{001\}$ . Direction of stacking is  $[010]$ , so the  $(010)$  face is highlighted in red.



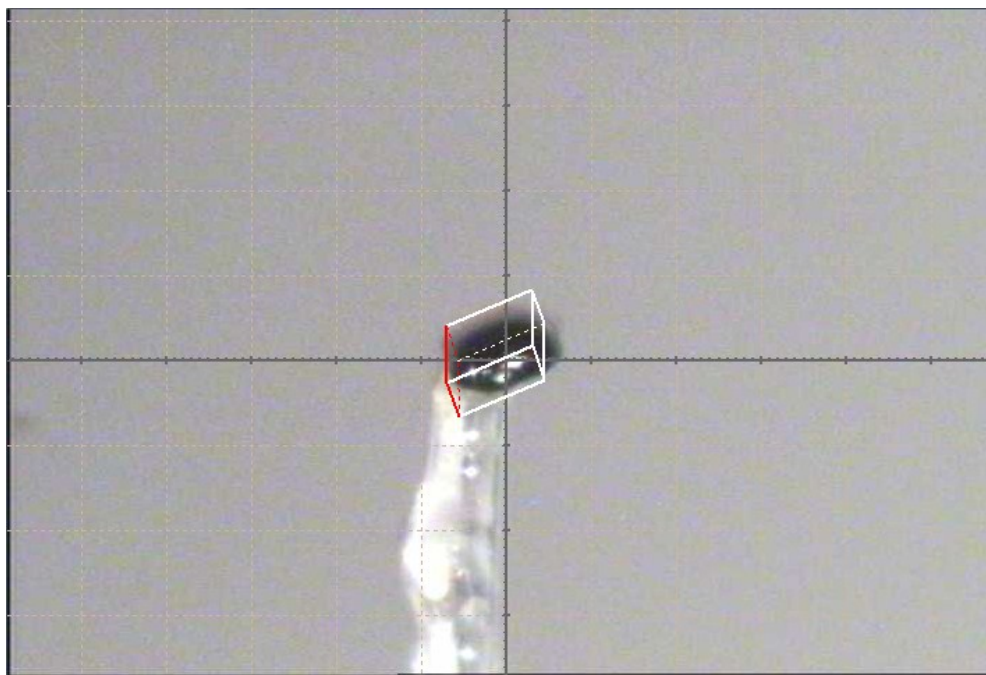

**Figure S15** Crystal of **6** with crystallographic axes indicated by defining fictive faces  $\{100\}$ ,  $\{010\}$  and  $\{001\}$ . Direction of stacking is the longest axis,  $[100]$ , so the  $(100)$  face is highlighted in red.

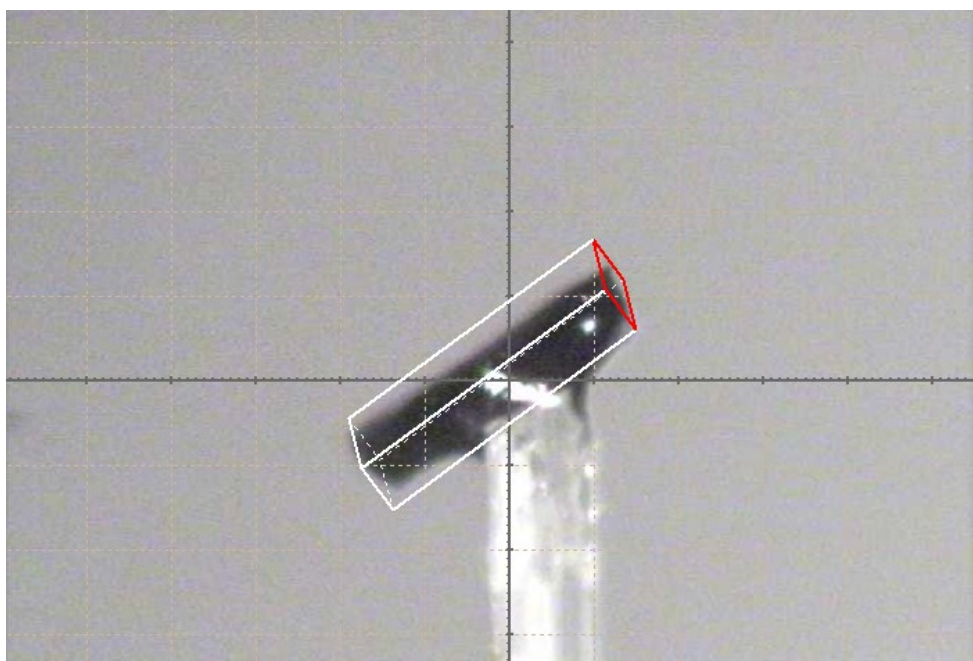

**Figure S16** Crystal of **7** with crystallographic axes indicated by defining fictive faces  $\{100\}$ ,  $\{010\}$  and  $\{001\}$ . Direction of stacking is the longest axis,  $[010]$ , so the  $(010)$  face is highlighted in red.

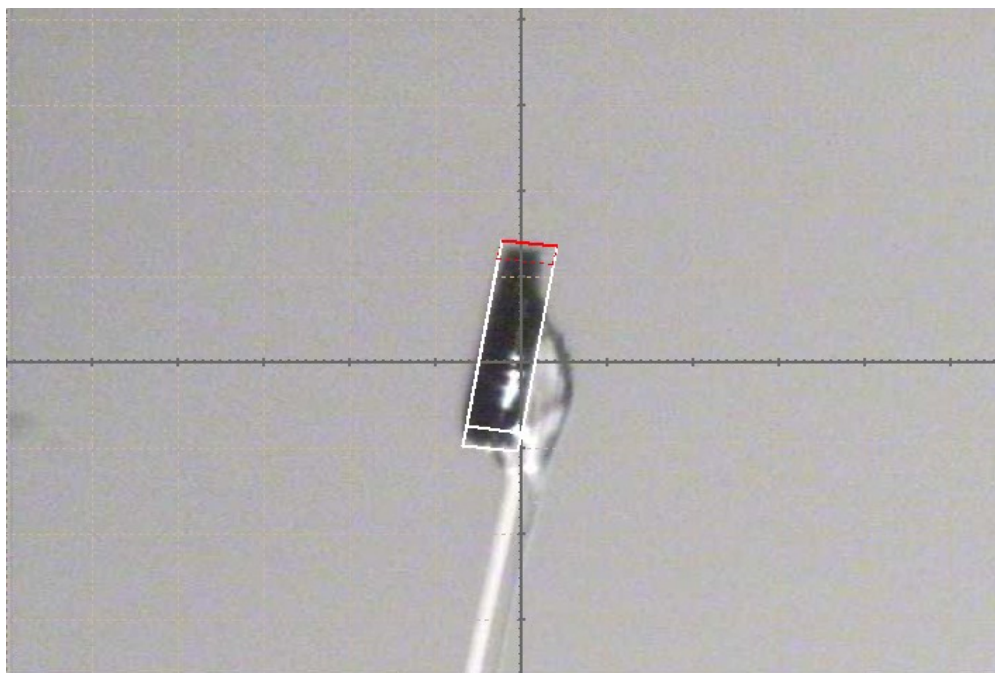

**Figure S17** Crystal of **8** with crystallographic axes indicated by defining fictive faces  $\{100\}$ ,  $\{010\}$  and  $\{001\}$ . Direction of stacking is the longest axis,  $[100]$ , so the  $(100)$  face is highlighted in red.

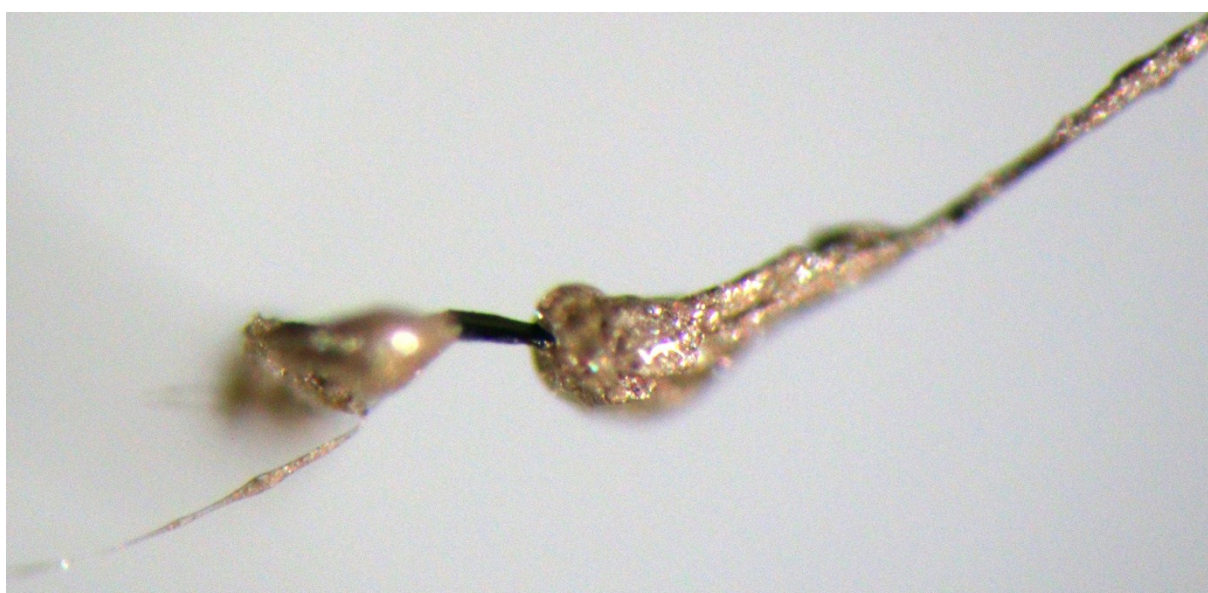

**Figure S18** A photograph of a small crystal of **9** (*ca.* 0.25 mm long) with electrical contacts applied to faces  $\{100\}$ .



**S5 Cartesian coordinates of the converged geometries and the corresponding absolute energies (in Hartrees).**

Cis-(parallel)-DDQ<sub>2</sub><sup>2-</sup> dimer at UM05-2X/6-311G(d,p), -2970.59602664 Hartrees.

|    |                 |                 |                 |
|----|-----------------|-----------------|-----------------|
| Cl | -0.155937000000 | -2.446349000000 | -1.759686000000 |
| Cl | -2.914411000000 | -2.670167000000 | -0.182980000000 |
| O  | -3.930087000000 | -0.075337000000 | 0.651752000000  |
| O  | 0.809229000000  | 0.297995000000  | -1.944823000000 |
| N  | -3.614207000000 | 3.389092000000  | 0.334442000000  |
| N  | -0.212957000000 | 3.662774000000  | -1.843236000000 |
| C  | -2.851785000000 | 0.022481000000  | 0.083860000000  |
| C  | -2.230830000000 | 1.297829000000  | -0.252644000000 |
| C  | -1.034720000000 | 1.392298000000  | -0.941427000000 |
| C  | -0.275565000000 | 0.225328000000  | -1.366735000000 |
| C  | -0.942640000000 | -1.061088000000 | -1.089925000000 |
| C  | -2.121173000000 | -1.152077000000 | -0.430813000000 |
| C  | -2.981087000000 | 2.460493000000  | 0.090304000000  |
| C  | -0.560326000000 | 2.652175000000  | -1.420495000000 |
| Cl | 2.940234000000  | -2.643047000000 | 0.183737000000  |
| Cl | 0.180122000000  | -2.446815000000 | 1.757640000000  |
| O  | -0.813740000000 | 0.288511000000  | 1.941609000000  |
| O  | 3.932987000000  | -0.037859000000 | -0.648846000000 |
| N  | 0.173777000000  | 3.662724000000  | 1.840392000000  |
| N  | 3.582366000000  | 3.424192000000  | -0.328362000000 |
| C  | 0.272623000000  | 0.226483000000  | 1.364834000000  |
| C  | 1.020797000000  | 1.400681000000  | 0.940762000000  |
| C  | 2.219180000000  | 1.318379000000  | 0.254022000000  |
| C  | 2.852934000000  | 0.049453000000  | -0.082390000000 |
| C  | 2.132384000000  | -1.132206000000 | 0.430152000000  |
| C  | 0.952487000000  | -1.052919000000 | 1.088513000000  |
| C  | 0.532470000000  | 2.655712000000  | 1.418599000000  |
| C  | 2.958570000000  | 2.488722000000  | -0.086329000000 |

Trans-(antiparallel)-DDQ<sub>2</sub><sup>2-</sup> dimer at UM05-2X/6-311G(d,p), -2970.60392538 Hartrees.

|    |                 |                 |                 |
|----|-----------------|-----------------|-----------------|
| Cl | -1.653626000000 | -2.266068000000 | 1.563929000000  |
| Cl | -3.992142000000 | -0.966471000000 | -0.163451000000 |
| O  | -3.542910000000 | 1.866108000000  | -0.690670000000 |
| O  | 0.511169000000  | -0.391894000000 | 2.095851000000  |
| N  | -1.450324000000 | 4.629066000000  | -0.150424000000 |
| N  | 1.467161000000  | 2.995758000000  | 2.067853000000  |
| C  | -2.608513000000 | 1.355655000000  | -0.077780000000 |
| C  | -1.456000000000 | 2.108225000000  | 0.379350000000  |
| C  | -0.431277000000 | 1.536019000000  | 1.117228000000  |
| C  | -0.411893000000 | 0.132135000000  | 1.471126000000  |
| C  | -1.603123000000 | -0.621638000000 | 1.041004000000  |
| C  | -2.604130000000 | -0.062214000000 | 0.320579000000  |

|    |                 |                 |                 |
|----|-----------------|-----------------|-----------------|
| C  | -1.451244000000 | 3.500694000000  | 0.073479000000  |
| C  | 0.636026000000  | 2.332063000000  | 1.630799000000  |
| Cl | 1.652004000000  | 2.265829000000  | -1.564920000000 |
| Cl | 3.991253000000  | 0.968099000000  | 0.162839000000  |
| O  | 3.542943000000  | -1.864143000000 | 0.692360000000  |
| O  | -0.511048000000 | 0.389713000000  | -2.097764000000 |
| N  | 1.452037000000  | -4.628669000000 | 0.152449000000  |
| N  | -1.464911000000 | -2.998277000000 | -2.068367000000 |
| C  | 2.608493000000  | -1.354557000000 | 0.078853000000  |
| C  | 1.456532000000  | -2.108023000000 | -0.378256000000 |
| C  | 0.431865000000  | -1.536855000000 | -1.116998000000 |
| C  | 0.411746000000  | -0.133104000000 | -1.471629000000 |
| C  | 1.602329000000  | 0.621577000000  | -1.041354000000 |
| C  | 2.603577000000  | 0.063008000000  | -0.320564000000 |
| C  | 1.452463000000  | -3.500360000000 | -0.071771000000 |
| C  | -0.634563000000 | -2.333799000000 | -1.630993000000 |
